# Supplementary material for: High-Efficiency Microplastic Sampling Device Improved Using CFD Analysis
Source: MDPI journal article supplement (doi:10.3390/su15053907), 2023-02-21
Supplement: s1 [file s1]

# Device for Low Cross-Contamination and High-Efficiency Sampling of Microplastics Less Than 20 $\mu\text{m}$ in Size from Water

Seonghyeon Ju <sup>1</sup>, Jongchan Yi <sup>2</sup>, Junho Lee <sup>1</sup>, Jiyeon Kim <sup>1</sup>, Chaehwi Lim <sup>1</sup>, Jihoon Lee <sup>1</sup>,  
Kyungtae Kim <sup>1</sup> and Yeojoon Yoon <sup>1,\*</sup>

<sup>1</sup> Department of Environmental and Energy Engineering, Yonsei University,  
Wonju 26493, Republic of Korea

<sup>2</sup> Water Environmental Safety Management Department, K-Water,  
Daejeon 34045, Republic of Korea

\* Correspondence: yajoon@yonsei.ac.kr

## Supplementary Materials

Table S1. CFD analysis conditions for the sampling devices

| Software Info.        |                                                                               |
|-----------------------|-------------------------------------------------------------------------------|
| Program               | FLOW-3D<br>(Flow Science, inc. 683 Harkle Rd, Suite a Santa Fe, Nm 87505 USA) |
| Solver version        | 12.0.3.02 Inx64 02/05/2021 HPC                                                |
| Physics model         |                                                                               |
| Gravity               | -9.81 m/s                                                                     |
| Viscosity             | Viscous flow                                                                  |
| Turbulence            | Renormalized group (RNG) model                                                |
| Fluid properties      |                                                                               |
| Density               | 1000 kg/                                                                      |
| Viscosity             | 0.001 kg/m/s (constant)                                                       |
| Reference pressure    | 101,300 Pa                                                                    |
| Mesh                  |                                                                               |
| Mesh type             | Structured grid (with FAVOR™)                                                 |
| Reference cell size   | 0.1 mm                                                                        |
| number of total cells | 8,000,000                                                                     |

**Table S2.** Recovery results using Device 1 with reference material

| No. | Initial weight of STS filter (mg) | D.I. water volume (mL) | Microplastics |             | Final weight of STS filter (mg) | Recovery (%)       |
|-----|-----------------------------------|------------------------|---------------|-------------|---------------------------------|--------------------|
|     |                                   |                        | Type          | Weight (mg) |                                 |                    |
| 1   | 594.13                            | 500                    | PP            | 30.0        | 622.75                          | <b>94.3 ± 1.7</b>  |
|     | 596.12                            |                        |               |             | 623.93                          |                    |
|     | 592.05                            |                        |               |             | 620.30                          |                    |
| 2   | 568.44                            | 500                    | PS            | 30.0        | 592.95                          | <b>86.3 ± 5.0</b>  |
|     | 576.41                            |                        |               |             | 602.79                          |                    |
|     | 573.83                            |                        |               |             | 600.91                          |                    |
| 3   | 596.08                            | 500                    | PET           | 30.0        | 622.15                          | <b>93.0 ± 5.6</b>  |
|     | 548.51                            |                        |               |             | 577.37                          |                    |
|     | 583.12                            |                        |               |             | 612.00                          |                    |
| 4   | 573.46                            | 500                    | PVC           | 30.0        | 602.26                          | <b>95.9 ± 0.9</b>  |
|     | 571.89                            |                        |               |             | 600.38                          |                    |
|     | 573.45                            |                        |               |             | 602.46                          |                    |
| 5   | 548.75                            | 500                    | PE            | 30.0        | 571.82                          | <b>90.0 ± 11.3</b> |
|     | 573.85                            |                        |               |             | 602.71                          |                    |
|     | 579.96                            |                        |               |             | 609.01                          |                    |

**Table S3.** Recovery results using Device 2 with reference material

| No. | Initial weight of STS filter (mg) | D.I. water volume (mL) | Microplastics |             | Final weight of STS filter (mg) | Recovery (%)      |
|-----|-----------------------------------|------------------------|---------------|-------------|---------------------------------|-------------------|
|     |                                   |                        | Type          | Weight (mg) |                                 |                   |
| 1   | 551.37                            | 500                    | PP            | 30.0        | 580.56                          | <b>89.9 ± 6.7</b> |
|     | 548.98                            |                        |               |             | 575.30                          |                   |
|     | 551.37                            |                        |               |             | 580.56                          |                   |
| 2   | 548.67                            | 500                    | PS            | 30.0        | 576.92                          | <b>93.0 ± 1.0</b> |
|     | 552.33                            |                        |               |             | 580.10                          |                   |
|     | 548.67                            |                        |               |             | 576.92                          |                   |
| 3   | 539.11                            | 500                    | PET           | 30.0        | 568.18                          | <b>96.2 ± 3.4</b> |
|     | 574.55                            |                        |               |             | 603.33                          |                   |
|     | 580.15                            |                        |               |             | 609.27                          |                   |
| 4   | 574.26                            | 500                    | PVC           | 30.0        | 599.86                          | <b>85.3 ± 1.1</b> |
|     | 574.38                            |                        |               |             | 600.23                          |                   |
|     | 573.66                            |                        |               |             | 598.80                          |                   |

|   |        |     |    |      |        |                   |
|---|--------|-----|----|------|--------|-------------------|
|   | 596.38 |     |    |      | 624.90 |                   |
| 5 | 593.22 | 500 | PE | 30.0 | 621.04 | <b>94.0 ± 1.1</b> |
|   | 574.18 |     |    |      | 602.25 |                   |

**Table S4.** Recovery results using Device 3 with reference material

| No. | Initial weight of STS filter (mg) | D.I. water volume (mL) | Microplastics |             | Final weight of STS filter (mg) | Recovery (%)        |
|-----|-----------------------------------|------------------------|---------------|-------------|---------------------------------|---------------------|
|     |                                   |                        | Type          | Weight (mg) |                                 |                     |
|     | 576.16                            |                        |               |             | 603.38                          |                     |
| 1   | 592.36                            | 500                    | PP            | 30.0        | 620.58                          | <b>92.7 ± 2.0</b>   |
|     | 593.75                            |                        |               |             | 621.82                          |                     |
|     | 577.42                            |                        |               |             | 599.13                          |                     |
| 2   | 580.78                            | 500                    | PS            | 30.0        | 606.40                          | <b>90.0 ± 4.8</b>   |
|     | 570.27                            |                        |               |             | 598.74                          |                     |
|     | 560.04                            |                        |               |             | 594.17                          |                     |
| 3   | 595.41                            | 500                    | PET           | 30.0        | 623.18                          | <b>100.6 ± 11.2</b> |
|     | 572.12                            |                        |               |             | 600.91                          |                     |
|     | 595.87                            |                        |               |             | 626.13                          |                     |
| 4   | 572.62                            | 500                    | PVC           | 30.0        | 599.53                          | <b>93.9 ± 5.4</b>   |
|     | 574.80                            |                        |               |             | 602.40                          |                     |
|     | 580.00                            |                        |               |             | 608.57                          |                     |
| 5   | 581.91                            | 500                    | PE            | 30.0        | 610.00                          | <b>93.6 ± 1.4</b>   |
|     | 574.87                            |                        |               |             | 602.52                          |                     |

**Table S5.** Size distribution 10% value size (µm)

| Microplastic type | Stage size range |          |            |
|-------------------|------------------|----------|------------|
|                   | Under 20 µm      | 20–45 µm | Over 45 µm |
| <b>PE</b>         | 10.8             | 13.1     | 15.6       |
| <b>PET</b>        | 6.5              | 7.7      | 45.8       |
| <b>PS</b>         | 8.3              | 10.3     | 16.1       |
| <b>PP</b>         | 8.1              | 8.5      | 9.6        |
| <b>PVC</b>        | 9.5              | 10.4     | 32.5       |

**Table S6.** Size distribution 90% value size (µm)

| Microplastic type | Stage size range |          |            |
|-------------------|------------------|----------|------------|
|                   | Under 20 µm      | 20–45 µm | Over 45 µm |
| <b>PE</b>         | 37.7             | 66.5     | 111.3      |
| <b>PET</b>        | 19.3             | 24.9     | 113.3      |
| <b>PS</b>         | 22.1             | 40.5     | 209.3      |

|     |      |      |       |
|-----|------|------|-------|
| PP  | 21.8 | 28.8 | 105.2 |
| PVC | 21.6 | 28.8 | 125.9 |

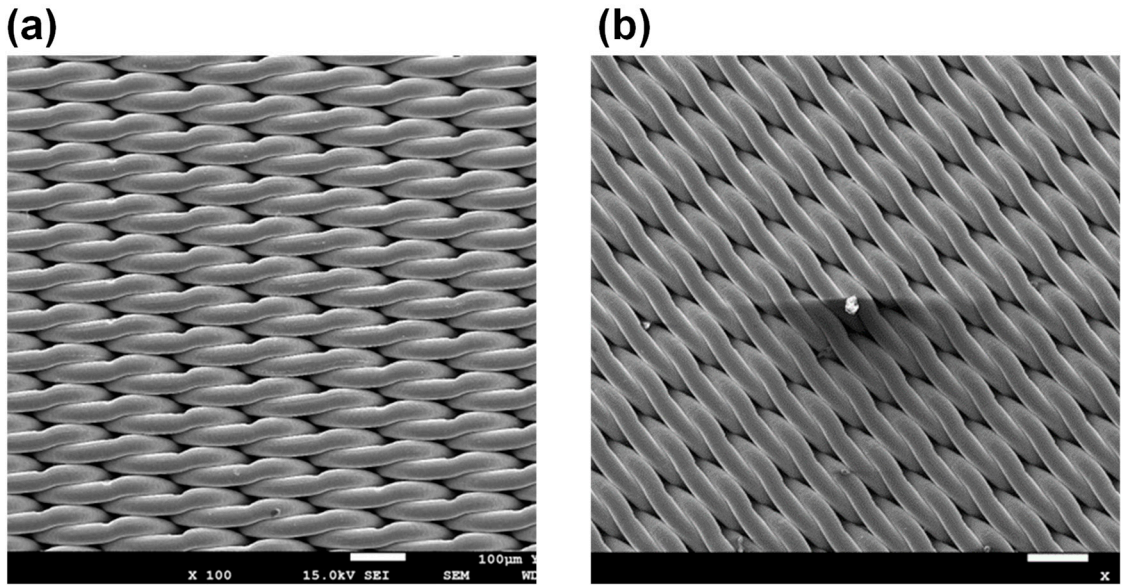

**Figure S1.** SEM image of STS filter (a) before and (b) after filtration.

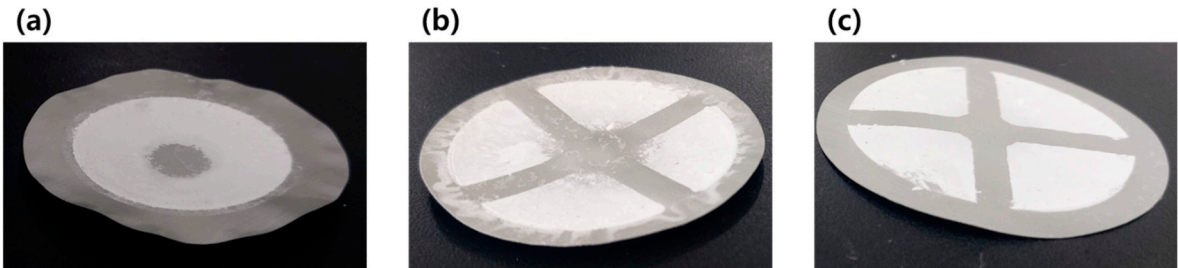

**Figure S2.** Visual results after filtration using the STS filter in (a) Device 1, (b) Device 2, (c) Device 3.
